# Supplementary material for: Fluoxetine Decreases the Proliferation and Adipogenic Differentiation of Human Adipose-Derived Stem Cells
Source: Int J Mol Sci. 2015 Jul 22;16(7):16655–68. doi: 10.3390/ijms160716655 (PMC4519971; doi:10.3390/ijms160716655)
Supplement: Supplementary file 1 [file ijms-16-16655-s001.xlsx]

## Sheet: Fluoxetine 5uM-FLX control
Symbol	Well	Fold Up- or Down-Regulation
		Test Sample /Control Sample
ACSL3	A01	1.13603	OKAY
ACSL4	A02	-1.03958	OKAY
ACSL5	A03	-1.31585	OKAY	WNT Pathway
ADM	A04	1.00278	OKAY	FOSL1	-2.0223
ARNT	A05	-1.12194	OKAY	MYC	-2.18253
ATF4	A06	1.17609	OKAY	MMP7	-2.25949
AXIN2	A07	1.37936	OKAY
BAX	A08	1.30495	OKAY	Oxidative Stress
BBC3	A09	1.84548	OKAY	SQSTM1	3.23553
BCL2	A10	-1.44995	B
BCL2A1	A11	-1.44995	OKAY	STAT3
BCL2L1	A12	1.02385	OKAY	LRG1	-2.63171
BIRC3	B01	-1.48041	OKAY
BMP2	B02	-1.16959	A	p53 Pathway
BMP4	B03	-1.35285	OKAY	RB1	-2.50707
BTG2	B04	1.2008	OKAY
CA9	B05	-1.27103	OKAY
CCL5	B06	1.21757	OKAY
CCND1	B07	1.21757	OKAY
CCND2	B08	-1.70055	A
CDKN1A	B09	1.5305	OKAY
CDKN1B	B10	-1.14552	OKAY
CEBPD	B11	1.32317	B
CPT2	B12	1.11265	OKAY
CSF1	C01	1.40834	OKAY
DAB2	C02	1.15189	OKAY
EGFR	C03	1.33237	OKAY
EMP1	C04	-1.16959	OKAY
EPO	C05	-1.91322	OKAY
FABP1	C06	-1.6888	A
FAS	C07	-1.0324	OKAY
FCER2	C08	-1.70055	OKAY
FOSL1	C09	-2.0223	OKAY
FTH1	C10	1.32317	OKAY
GADD45A	C11	1.02385	OKAY
GADD45B	C12	1.28699	OKAY
GATA3	D01	-1.93992	A
GCLC	D02	1.01677	OKAY
GCLM	D03	-1.01115	OKAY
GSR	D04	1.05995	OKAY
HERPUD1	D05	1.22603	OKAY
HES1	D06	1.21757	OKAY
HES5	D07	1.20916	B
HEY1	D08	-1.46003	OKAY
HEY2	D09	-1.92652	A
HEYL	D10	-1.9	A
HMOX1	D11	1.5305	OKAY
ICAM1	D12	-1.16959	OKAY
ID1	E01	-1.04681	OKAY
IFNG	E02	-1.56482	A
IFRD1	E03	1.18427	OKAY
IRF1	E04	-1.09885	OKAY
JAG1	E05	-1.22774	OKAY
LDHA	E06	1.03097	OKAY
LFNG	E07	-1.72429	A
LRG1	E08	-2.63171	A
MCL1	E09	-1.18591	OKAY
MMP7	E10	-2.25949	A
MYC	E11	-2.18253	OKAY
NOTCH1	E12	-1.32501	OKAY
NQO1	F01	1.03097	OKAY
OLR1	F02	-1.56482	OKAY
PCNA	F03	1.12039	OKAY
PPARD	F04	1.06733	OKAY
PTCH1	F05	-1.56482	A
RB1	F06	-2.50707	OKAY
SERPINE1	F07	1.06733	OKAY
SLC27A4	F08	1.07475	OKAY
SLC2A1	F09	-1.13761	OKAY
SOCS3	F10	1.05263	OKAY
SORBS1	F11	-1.83528	OKAY
SQSTM1	F12	3.23553	OKAY
STAT1	G01	-1.01819	OKAY
TNF	G02	-1.6888	A
TNFSF10	G03	-1.38127	OKAY
TXN	G04	1.02385	OKAY
TXNRD1	G05	-1.00417	OKAY
VEGFA	G06	-1.18591	OKAY
WISP1	G07	-1.27103	OKAY
WNT1	G08	-1.56482	A
WNT2B	G09	-1.64262	OKAY
WNT3A	G10	-1.67714	B
WNT5A	G11	-1.08373	OKAY
WNT6	G12	-1.88688	A
ACTB	H01	1.06733	OKAY
B2M	H02	1.01677	OKAY
GAPDH	H03	-1.11419	OKAY
HPRT1	H04	-1.09885	OKAY
RPLP0	H05	1.12818	OKAY

## Sheet: Fluoxetine 5uM
Symbol	Well	Fold Up- or Down-Regulation
		Test Sample /Control Sample
ACSL3	A01	1.13603
ACSL4	A02	-1.21926
ACSL5	A03	2.06194		WNT Pathway			JAK1, 3 / STAT6
ADM	A04	1.10496		FOSL1	-4.67835		GATA3	2.5562
ARNT	A05	1.38896		MYC	-2.55974		FCER2	2.50359
ATF4	A06	1.36037
AXIN2	A07	1.55186		Notch Pathway			NFκB Pathway
BAX	A08	1.31403		HEY1	3.06099		IFNG	5.00719
BBC3	A09	2.00555		HEY2	2.87587
BCL2	A10	2.19466		HEYL	2.95672		PPAR Pathway
BCL2A1	A11	1.499		HES1	2.998		SORBS1	3.28069
BCL2L1	A12	-1.24487
BIRC3	B01	1.08975		Oxidative Stress
BMP2	B02	2.07628		SQSTM1	4.3289
BMP4	B03	-1.5977		HMOX1	2.83628
BTG2	B04	2.30378
CA9	B05	2.33593		Hedgehog Pathway
CCL5	B06	2.50359		WNT1	3.14705
CCND1	B07	-1.8226		WNT3A	2.89588
CCND2	B08	2.19466		WNT6	2.72074
CDKN1A	B09	1.34164
CDKN1B	B10	1.17609
CEBPD	B11	-2.47255
CPT2	B12	1.44794
CSF1	C01	1.48865
DAB2	C02	-1.49071
EGFR	C03	1.01677
EMP1	C04	-1.49071
EPO	C05	2.35218
FABP1	C06	2.35218
FAS	C07	1.05995
FCER2	C08	2.50359
FOSL1	C09	-4.67835
FTH1	C10	1.19251
GADD45A	C11	-1.06142
GADD45B	C12	1.38896
GATA3	D01	2.5562
GCLC	D02	1.87125
GCLM	D03	1.2518
GSR	D04	1.2781
HERPUD1	D05	1.62902
HES1	D06	2.998
HES5	D07	-1.11419
HEY1	D08	3.06099
HEY2	D09	2.87587
HEYL	D10	2.95672
HMOX1	D11	2.83628
ICAM1	D12	1.06733
ID1	E01	1.7219
IFNG	E02	5.00719
IFRD1	E03	1.82008
IRF1	E04	-1.11419
JAG1	E05	1.28699
LDHA	E06	1.14393
LFNG	E07	-1.0324
LRG1	E08	2.36854
MCL1	E09	-1.64262
MMP7	E10	2.00555
MYC	E11	-2.55974
NOTCH1	E12	1.428
NQO1	F01	1.64035
OLR1	F02	2.16445
PCNA	F03	-1.01115
PPARD	F04	-1.00417
PTCH1	F05	2.3198
RB1	F06	-2.18253
SERPINE1	F07	-1.39088
SLC27A4	F08	-1.32501
SLC2A1	F09	1.07475
SOCS3	F10	-1.06881
SORBS1	F11	3.28069
SQSTM1	F12	4.3289
STAT1	G01	-1.03958
TNF	G02	2.09072
TNFSF10	G03	1.68646
TXN	G04	1.06733
TXNRD1	G05	1.10496
VEGFA	G06	-1.27103
WISP1	G07	1.2008
WNT1	G08	3.14705
WNT2B	G09	1.428
WNT3A	G10	2.89588
WNT5A	G11	-1.00417
WNT6	G12	2.72074
ACTB	H01	1.04536
B2M	H02	-1.08373
GAPDH	H03	1.10496
HPRT1	H04	-1.12194
RPLP0	H05	1.05263
